# Supplementary material for: Pathological Complete Response in Patients With Resected Pancreatic Adenocarcinoma After Preoperative Chemotherapy
Source: PubMed Central journal article supplement (PMC11185983; doi:10.1001/jamanetworkopen.2024.17625), 2024-06-18
Supplement: jamanetwopen-e2417625-s001.pdf [file jamanetwopen-e2417625-s001.pdf]

## Supplementary Online Content

Stoop TF, Oba A, Wu YHA, et al. Pathological complete response in patients with resected pancreatic adenocarcinoma after preoperative chemotherapy. *JAMA Netw Open*. 2024;7(6):e2417625. doi:10.1001/jamanetworkopen.2024.17625

**eAppendix 1.** Incidence of pCR per Center

**eAppendix 2.** Surgical Details, Surgical Outcome, and Adjuvant Therapy

**eAppendix 3.** Histopathology

**eAppendix 4.** Clinicopathological and Treatment Characteristics (Row Percentages)

**eAppendix 5.** Survival

**eAppendix 6.** Recurrence Site in Patients With Disease Recurrence

**eAppendix 7.** Region-Specific Data

This supplementary material has been provided by the authors to give readers additional information about their work.

**APPENDIX 1.** Incidence of pCR per center

| <b>Center</b> | <b>Total number of patients<br/>(n)</b> | <b>Patients with pCR<br/>(n)</b> | <b>Incidence of pCR<br/>(%)</b> |
|---------------|-----------------------------------------|----------------------------------|---------------------------------|
| 1             | 131                                     | 5                                | 3.8                             |
| 2             | 188                                     | 1                                | 0.5                             |
| 3             | 99                                      | 0                                | 0                               |
| 4             | 5                                       | 2                                | 40.0                            |
| 5             | 84                                      | 0                                | 0                               |
| 6             | 63                                      | 1                                | 1.6                             |
| 7             | 14                                      | 0                                | 0                               |
| 8             | 23                                      | 2                                | 8.7                             |
| 9             | 597                                     | 45                               | 7.5                             |
| 10            | 58                                      | 1                                | 1.7                             |
| 11            | 6                                       | 0                                | 0                               |
| 12            | 34                                      | 3                                | 8.8                             |
| 13            | 25                                      | 2                                | 8.0                             |
| 14            | 49                                      | 2                                | 4.1                             |
| 15            | 101                                     | 3                                | 3.0                             |
| 16            | 200                                     | 15                               | 7.5                             |
| 17            | 41                                      | 0                                | 0                               |
| 18            | 19                                      | 2                                | 10.5                            |
| 19            | 21                                      | 1                                | 4.8                             |

pCR, pathological complete response

## APPENDIX 2. Surgical details, surgical outcome, and adjuvant therapy

| Variables               | Patients, No. (%)          |               |                    | P value <sup>±</sup>        |
|-------------------------|----------------------------|---------------|--------------------|-----------------------------|
|                         | Overall cohort<br>n = 1758 | pCR<br>n = 85 | No pCR<br>n = 1673 |                             |
| Pancreatectomy          |                            |               |                    |                             |
| Pancreatoduodenectomy   | 1262 (71.8)                | 66 (77.6)     | 1196 (71.5)        | .34 <sup>c</sup>            |
| Distal pancreatectomy   | 400 (22.8)                 | 14 (16.5)     | 386 (23.1)         |                             |
| Total pancreatectomy    | 96 (5.5)                   | 5 (5.9)       | 91 (5.4)           |                             |
| Extended resection      | 696 (39.6)                 | 30 (35.3)     | 666 (39.8)         | .40 <sup>b</sup>            |
| Vascular resection      | 615 (35.0)                 | 21 (24.7)     | 594 (35.5)         | <b>.04<sup>b</sup></b>      |
| None                    | 1142 (65.0)                | 64 (75.3)     | 1078 (64.5)        | <b>.05<sup>b</sup></b>      |
| Venous alone            | 476 (27.1)                 | 20 (23.5)     | 456 (27.3)         |                             |
| Arterial alone          | 135 (7.7)                  | 1 (1.2)       | 134 (8.0)          |                             |
| Venous + arterial       | 4 (0.2)                    | 0 (0)         | 4 (0.2)            |                             |
| Missing                 | 1                          | 0             | 1                  |                             |
| Multivisceral resection | 128 (7.3)                  | 11 (12.9)     | 117 (7.0)          | <b>.04<sup>b</sup></b>      |
| Missing                 | 1                          | 0             | 1                  |                             |
| Major morbidity         | 259 (14.7)                 | 11 (12.9)     | 248 (14.8)         | .68 <sup>b</sup>            |
| Missing                 | 271 (15.4)                 | 11 (12.9)     | 260 (15.5)         |                             |
| 90-day mortality        | 55 (3.2)                   | 2 (2.6)       | 53 (3.2)           | >.999 <sup>c</sup>          |
| Missing                 | 32                         | 7             | 25                 |                             |
| Adjuvant chemotherapy   | 1150 (65.4)                | 30 (35.3)     | 1120 (66.9)        | <b>&lt;.001<sup>b</sup></b> |
| Missing                 | 157 (8.9)                  | 6 (7.1)       | 151 (9.0)          |                             |

pCR, pathological complete response; ±, comparison between patients with or without pCR. a, Welch independent two-sample T-Test; b, Chi-square Test; c, Fisher's Exact Test; d, Wilcoxon Rank Sum Test.

NB. Categorical data with missing data for ≥2% of patients were included in a separate category and were therefore included in the overall proportions and in the test of association. Otherwise, for missing <2%, the data are shown but were not included in the hypothesis tests.

NB. See **Appendix 4** for the presentation of these data using row percentages.

### APPENDIX 3. Histopathology

| Variables                      | Patients, No. (%)          |               |                    | P value <sup>±</sup>        |
|--------------------------------|----------------------------|---------------|--------------------|-----------------------------|
|                                | Overall cohort<br>n = 1758 | pCR<br>n = 85 | No pCR<br>n = 1673 |                             |
| Tumor size                     |                            |               |                    |                             |
| ≤ 20 mm                        | 646 (36.7)                 | 72 (84.7)     | 574 (34.3)         | <b>&lt;.001<sup>c</sup></b> |
| 21 - 40 mm                     | 830 (47.2)                 | 6 (7.1)       | 824 (49.3)         |                             |
| > 40 mm                        | 225 (12.8)                 | 4 (4.7)       | 221 (13.2)         |                             |
| Missing                        | 57 (3.2)                   | 3 (3.5)       | 54 (3.2)           |                             |
| ypT stage                      |                            |               |                    |                             |
| Tx/TO                          | 94 (5.3)                   | 83 (97.6)     | 11 (0.7)           | <b>&lt;.001<sup>c</sup></b> |
| Tis                            | 5 (0.3)                    | 2 (2.4)       | 3 (0.2)            |                             |
| T1                             | 325 (18.5)                 | 0 (0)         | 325 (19.4)         |                             |
| T2                             | 367 (20.9)                 | 0 (0)         | 367 (21.9)         |                             |
| T3                             | 897 (51.0)                 | 0 (0)         | 897 (53.6)         |                             |
| T4                             | 70 (4.0)                   | 0 (0)         | 70 (4.2)           |                             |
| Missing                        |                            |               |                    |                             |
| ypN stage                      |                            |               |                    |                             |
| N0                             | 936 (53.6)                 | 83 (97.6)     | 853 (51.3)         | <b>&lt;.001<sup>c</sup></b> |
| N1-2                           | 811 (46.4)                 | 2 (2.4)       | 809 (48.7)         |                             |
| Missing                        | 11                         | 0             | 11                 |                             |
| ypM stage                      |                            |               |                    |                             |
| M0                             | 1252 (71.2)                | 67 (78.8)     | 1185 (70.8)        | <b>.03<sup>c</sup></b>      |
| M1                             | 44 (2.5)                   | 0 (0)         | 44 (2.6)           |                             |
| Mx                             | 265 (15.1)                 | 15 (17.6)     | 250 (14.9)         |                             |
| Missing                        | 197 (11.2)                 | 3 (3.5)       | 194 (11.6)         |                             |
| Lymphovascular invasion        |                            |               |                    |                             |
| Missing                        | 94 (5.3)                   | 12 (14.1)     | 82 (4.9)           | <b>&lt;.001<sup>c</sup></b> |
| Perineural invasion            | 1177 (67.0)                | 0 (0)         | 1177 (70.4)        |                             |
| Missing                        | 63 (3.6)                   | 12 (14.1)     | 51 (3.0)           | <b>&lt;.001<sup>c</sup></b> |
| Differentiation                |                            |               |                    |                             |
| Gx (not possible to determine) | 190 (10.8)                 | 60 (70.6)     | 130 (7.8)          | <b>&lt;.001<sup>c</sup></b> |
| G1 (well differentiated)       | 241 (13.7)                 | 0 (0)         | 241 (14.4)         |                             |
| G2 (moderate differentiated)   | 831 (47.3)                 | 0 (0)         | 831 (49.7)         |                             |
| G3 (poorly differentiated)     | 320 (18.2)                 | 0 (0)         | 320 (19.1)         |                             |
| G4 (undifferentiated)          | 3 (0.2)                    | 0 (0)         | 3 (0.2)            |                             |
| Missing                        | 173 (9.8)                  | 25 (29.4)     | 148 (8.8)          |                             |
| Unknown/missing                |                            |               |                    |                             |
| Residual disease               |                            |               |                    |                             |
| R0                             | 1267 (72.1)                | 79 (92.9)     | 1188 (71.0)        | <b>&lt;.001<sup>c</sup></b> |
| R1                             | 299 (17.0)                 | 0 (0)         | 299 (17.9)         |                             |
| R2                             | 8 (0.5)                    | 0 (0)         | 8 (0.5)            |                             |
| Unknown/missing                | 184 (10.5)                 | 6 (7.1)       | 178 (10.6)         |                             |

pCR, pathological complete response; ml, milliliters; ±, comparison between patients with or without pCR. a, Welch independent two-sample T-Test; b, Chi-square Test; c, Fisher's Exact Test; d, Wilcoxon Rank Sum Test.

NB. Categorical data with missing data for ≥2% of patients were included in a separate category and were therefore included in the overall proportions and in the test of association. Otherwise, for missing <2%, the data are shown but were not included in the hypothesis tests. NB. In some patients with pCR, a tumor size >0mm was registered. Because no vital tumor cells were detected, this suggests that the assumed 'former non-vital tumor tissue' is included in calculating the tumor size by the local pathologist. NB. In some patients with pCR, data about lymphovascular invasion, perineural invasion, tumor differentiation, and/or residual disease is missing. This data is handled as missing, although the absence of lymphovascular and perineural invasion, impossibility to determine differentiation, and no residual disease in the resection margins can be assumed. NB. See **Appendix 4** for the presentation of these data using row percentages.

**APPENDIX 4. Clinicopathological and treatment characteristics (row percentages)**

| Variables                                    | Patients, No. (%)          |               |                    | P value <sup>±</sup> |
|----------------------------------------------|----------------------------|---------------|--------------------|----------------------|
|                                              | Overall cohort<br>n = 1758 | pCR<br>n = 85 | No pCR<br>n = 1673 |                      |
| <b>Baseline characteristics at diagnosis</b> |                            |               |                    |                      |
| Age (mean ± SD) (years)                      | 64 (9)                     | 62 (9)        | 64 (9)             | .01 <sup>a</sup>     |
| Sex                                          |                            |               |                    |                      |
| Female                                       | 879 (100)                  | 41 (4.7)      | 838 (95.3)         | .74 <sup>b</sup>     |
| Male                                         | 879 (100)                  | 44 (5.0)      | 835 (95.0)         |                      |
| ASA-PS                                       |                            |               |                    |                      |
| I-II                                         | 1295 (100)                 | 45 (3.5)      | 1250 (96.5)        | <.001 <sup>b</sup>   |
| III-IV                                       | 456 (100)                  | 40 (8.8)      | 416 (91.2)         |                      |
| Missing                                      | 7                          | 0             | 7                  |                      |
| Resectability                                |                            |               |                    |                      |
| Primary resectable                           | 429 (100)                  | 6 (1.4)       | 423 (98.6)         | <.001 <sup>b</sup>   |
| Borderline resectable                        | 856 (100)                  | 43 (5.0)      | 813 (95.0)         |                      |
| Locally advanced                             | 465 (100)                  | 36 (7.7)      | 429 (92.3)         |                      |
| Missing                                      | 8                          | 0             | 8                  |                      |
| Tumor location                               |                            |               |                    |                      |
| Pancreatic head                              | 1276 (100)                 | 71 (5.6)      | 1205 (94.4)        | .02 <sup>b</sup>     |
| Pancreatic body/tail                         | 481 (100)                  | 14 (2.9)      | 467 (97.1)         |                      |
| Missing                                      | 1                          | 0             | 1                  |                      |
| Tumor size                                   |                            |               |                    |                      |
| ≤ 20 mm                                      | 385 (100)                  | 9 (2.3)       | 376 (97.7)         | .005 <sup>b</sup>    |
| 21 - 40 mm                                   | 1095 (100)                 | 51 (4.7)      | 1044 (95.3)        |                      |
| > 40 mm                                      | 255 (100)                  | 20 (7.8)      | 235 (92.2)         |                      |
| Missing                                      | 23                         | 5             | 18                 |                      |
| cT stage                                     |                            |               |                    | .10 <sup>b</sup>     |
| T1/T2                                        | 425 (100)                  | 27 (6.4)      | 398 (93.6)         |                      |
| T3/T4                                        | 1332 (100)                 | 58 (4.4)      | 1274 (95.6)        |                      |
| Missing                                      | 1                          | 0             | 1                  |                      |
| CA-19.9                                      |                            |               |                    |                      |
| Median (IQR)                                 | 183 (46-626)               | 105 (31-475)  | 185 (48-633)       | .11 <sup>d</sup>     |
| < 37 U/ml                                    | 317 (100)                  | 16 (5.0)      | 301 (95.0)         | <.001 <sup>b</sup>   |
| ≥ 37 - < 150 U/ml                            | 342 (100)                  | 17 (5.0)      | 325 (95.0)         |                      |
| ≥ 150 - < 500 U/ml                           | 360 (100)                  | 8 (2.2)       | 352 (97.8)         |                      |
| ≥ 500 - < 1000 U/ml                          | 156 (100)                  | 6 (3.8)       | 150 (96.2)         |                      |
| ≥ 1000 U/ml                                  | 259 (100)                  | 8 (3.1)       | 251 (96.9)         |                      |
| Missing                                      | 324 (100)                  | 30 (9.3)      | 294 (90.7)         |                      |
| CEA                                          |                            |               |                    |                      |
| Median (IQR)                                 | 3.1 (2.1-5.3)              | 2.6 (2.1-4.4) | 3.2 (2.1-5.4)      | .41 <sup>d</sup>     |
| Normal                                       | 633 (100)                  | 21 (3.3)      | 612 (96.7)         | <.001 <sup>c</sup>   |
| > 5 - ≤ 20 ng/ml                             | 204 (100)                  | 2 (1.0)       | 202 (99.0)         |                      |
| > 20 ng/ml                                   | 34 (100)                   | 2 (5.9)       | 32 (94.1)          |                      |
| Missing                                      | 887 (100)                  | 60 (70.6)     | 827 (93.2)         |                      |
| <b>Preoperative therapy</b>                  |                            |               |                    |                      |
| Chemotherapy*                                |                            |               |                    |                      |
| (m)FOLFIRINOX                                | 797 (100)                  | 50 (6.3)      | 747 (93.7)         | <.001 <sup>c</sup>   |
| Gemcitabine-nab-paclitaxel                   | 501 (100)                  | 11 (2.2)      | 490 (97.8)         |                      |
| Gemcitabine-S1                               | 100 (100)                  | 1 (1.0)       | 99 (99.0)          |                      |

|                                |            |            |             |                    |
|--------------------------------|------------|------------|-------------|--------------------|
| Gemcitabine-oxaliplatin        | 101 (100)  | 2 (2.0)    | 99 (98.0)   |                    |
| Other multi-agent regimens     | 90 (100)   | 9 (10.0)   | 81 (90.0)   |                    |
| Gemcitabine                    | 97 (100)   | 7 (7.2)    | 90 (92.8)   |                    |
| S1                             | 53 (100)   | 2 (3.8)    | 51 (96.2)   |                    |
| Other single-agent regimens    | 19 (100)   | 3 (15.8)   | 16 (84.2)   |                    |
| Second-line chemotherapy       |            |            |             |                    |
| No                             | 1468 (100) | 70 (4.8)   | 1398 (95.2) | .55 <sup>c</sup>   |
| Yes                            | 216 (100)  | 13 (6.0)   | 203 (94.0)  |                    |
| Missing                        | 74 (100)   | 2 (2.7)    | 72 (97.3)   |                    |
| Chemotherapy dose reduction    |            |            |             |                    |
| No                             | 848 (100)  | 22 (2.6)   | 826 (97.4)  | <.001 <sup>b</sup> |
| Yes                            | 250 (100)  | 6 (2.4)    | 244 (97.6)  |                    |
| Missing                        | 660 (100)  | 57 (8.6)   | 603 (91.4)  |                    |
| Radiotherapy                   |            |            |             |                    |
| No                             | 871 (100)  | 17 (2.0)   | 854 (98.0)  | <.001 <sup>b</sup> |
| Yes, conventional radiotherapy | 462 (100)  | 37 (8.0)   | 425 (92.0)  |                    |
| Yes, SBRT                      | 410 (100)  | 31 (7.6)   | 379 (92.4)  |                    |
| Missing                        | 15         | 0          | 15          |                    |
| Preoperative therapy duration  |            |            |             |                    |
| < 4 months                     | 475 (100)  | 16 (3.4)   | 459 (96.6)  | <.001 <sup>c</sup> |
| ≥ 4 to < 6 months              | 469 (100)  | 16 (3.4)   | 453 (96.6)  |                    |
| ≥ 6 to < 12 months             | 637 (100)  | 34 (5.3)   | 603 (94.7)  |                    |
| ≥ 12 months                    | 118 (100)  | 16 (13.6)  | 102 (86.4)  |                    |
| Missing                        | 59 (100)   | 3 (5.1)    | 56 (94.9)   |                    |
| <b>Response evaluation</b>     |            |            |             |                    |
| RECIST                         |            |            |             |                    |
| Complete response              | 14 (100)   | 4 (28.6)   | 10 (71.4)   | <.001 <sup>c</sup> |
| Partial response               | 506 (100)  | 61 (12.1)  | 445 (87.9)  |                    |
| Stable disease                 | 1194 (100) | 19 (1.6)   | 1175 (98.4) |                    |
| Progressive disease            | 25 (100)   | 1 (4.0)    | 24 (96.0)   |                    |
| Missing                        | 19         | 0          | 19          |                    |
| CA-19.9                        |            |            |             |                    |
| Median (IQR)                   | 36 (15-92) | 19 (13-35) | 37 (15-95)  | .003 <sup>d</sup>  |
| Normal                         | 773 (100)  | 43 (5.6)   | 730 (94.4)  | <.001 <sup>c</sup> |
| ≥ 37 - < 150 U/ml              | 493 (100)  | 7 (1.4)    | 486 (98.6)  |                    |
| ≥ 150 - < 500 U/ml             | 170 (100)  | 3 (1.8)    | 167 (98.2)  |                    |
| ≥ 500 - < 1000 U/ml            | 37 (100)   | 1 (2.7)    | 36 (97.3)   |                    |
| ≥ 1000 U/ml                    | 40 (100)   | 0 (0)      | 40 (100)    |                    |
| Missing                        | 245 (100)  | 31 (12.7)  | 214 (87.3)  |                    |
| CA-19.9 patterns               |            |            |             |                    |
| Normal to normal               | 281 (100)  | 12 (4.3)   | 269 (95.7)  | <.001 <sup>c</sup> |
| Normal to elevated             | 17 (100)   | 1 (5.9)    | 16 (94.1)   |                    |
| Elevated to normal             | 415 (100)  | 23 (5.5)   | 392 (94.5)  |                    |
| Elevated to elevated           | 655 (100)  | 10 (1.5)   | 645 (98.5)  |                    |
| Missing                        | 390 (100)  | 39 (10.0)  | 351 (90.0)  |                    |
| Relative CA-19.9 change        |            |            |             |                    |
| No change/increased            | 93 (100)   | 2 (2.2)    | 91 (97.8)   | <.001 <sup>c</sup> |
| Decreased < 87%                | 538 (100)  | 9 (1.7)    | 529 (98.3)  |                    |
| Decreased ≥ 87%                | 439 (100)  | 22 (5.0)   | 417 (95.0)  |                    |

|                                                                |               |               |               |                    |
|----------------------------------------------------------------|---------------|---------------|---------------|--------------------|
| < 37 U/ml at time of diagnosis                                 | 317 (100)     | 16 (5.0)      | 301 (95.0)    |                    |
| Missing                                                        | 371 (100)     | 36 (9.7)      | 335 (90.3)    |                    |
| CEA                                                            |               |               |               |                    |
| Median (IQR)                                                   | 2.9 (2.0-4.6) | 2.9 (1.8-4.2) | 2.9 (2.0-4.6) | .85 <sup>d</sup>   |
| Normal                                                         | 744 (100)     | 21 (2.8)      | 723 (97.2)    | <.001 <sup>c</sup> |
| > 5 - ≤ 20 ng/ml                                               | 189 (100)     | 3 (1.6)       | 186 (98.4)    |                    |
| > 20 ng/ml                                                     | 20 (100)      | 0 (0)         | 20 (100)      |                    |
| Missing                                                        | 805 (100)     | 61 (7.6)      | 744 (92.4)    |                    |
| CEA patterns                                                   |               |               |               |                    |
| Normal to normal                                               | 520 (100)     | 13 (2.5)      | 507 (97.5)    | <.001 <sup>c</sup> |
| Normal to elevated                                             | 53 (100)      | 1 (1.9)       | 52 (98.1)     |                    |
| Elevated to normal                                             | 100 (100)     | 2 (2.0)       | 98 (98.0)     |                    |
| Elevated to elevated                                           | 110 (100)     | 0 (0)         | 110 (100)     |                    |
| Missing                                                        | 975 (100)     | 69 (7.1)      | 906 (92.9)    |                    |
| <b>Surgery details, surgical outcome, and adjuvant therapy</b> |               |               |               |                    |
| Pancreatectomy                                                 |               |               |               |                    |
| Pancreatoduodenectomy                                          | 1262 (100)    | 66 (5.2)      | 1196 (94.8)   | .34 <sup>c</sup>   |
| Distal pancreatectomy                                          | 400 (100)     | 14 (3.5)      | 386 (96.5)    |                    |
| Total pancreatectomy                                           | 96 (100)      | 5 (5.2)       | 91 (98.4)     |                    |
| Extended resection                                             |               |               |               |                    |
| Vascular resection                                             | 696 (100)     | 30 (4.3)      | 666 (95.7)    | .40 <sup>b</sup>   |
| None                                                           | 615 (100)     | 21 (3.4)      | 594 (96.6)    | .04 <sup>b</sup>   |
| Venous alone                                                   | 1142 (100)    | 64 (5.6)      | 1078 (94.4)   | .05 <sup>b</sup>   |
| Venous + arterial                                              | 476 (100)     | 20 (4.2)      | 456 (95.8)    |                    |
| Arterial alone                                                 | 135 (100)     | 1 (0.7)       | 134 (99.3)    |                    |
| Venous + arterial                                              | 4 (100)       | 0 (0)         | 4 (100)       |                    |
| Missing                                                        | 1             | 0             | 1             |                    |
| Multivisceral resection                                        | 128 (100)     | 11 (8.6)      | 117 (91.4)    | .04 <sup>b</sup>   |
| Missing                                                        | 1             | 0             | 1             |                    |
| Major morbidity                                                |               |               |               |                    |
| No                                                             | 1228 (100)    | 63 (5.1)      | 1165 (94.9)   | .68 <sup>b</sup>   |
| Yes                                                            | 259 (100)     | 11 (4.2)      | 248 (95.8)    |                    |
| Missing                                                        | 271 (100)     | 11 (4.1)      | 260 (95.9)    |                    |
| 90-day mortality                                               |               |               |               |                    |
| No                                                             | 1671 (100)    | 76 (4.5)      | 1595 (95.5)   | >.999 <sup>c</sup> |
| Yes                                                            | 55 (3.2)      | 2 (3.6)       | 53 (96.4)     |                    |
| Missing                                                        | 32            | 7             | 25            |                    |
| Adjuvant chemotherapy                                          |               |               |               |                    |
| No                                                             | 451 (100)     | 49 (10.9)     | 402 (89.1)    | <.001 <sup>b</sup> |
| Yes                                                            | 1150 (100)    | 30 (2.6)      | 1120 (97.4)   |                    |
| Missing                                                        | 157 (100)     | 6 (3.8)       | 151 (96.2)    |                    |
| <b>Histopathology</b>                                          |               |               |               |                    |
| Tumor size                                                     |               |               |               |                    |
| ≤ 20 mm                                                        | 646 (100)     | 72 (11.1)     | 574 (88.9)    | <.001 <sup>c</sup> |
| 21 - 40 mm                                                     | 830 (100)     | 6 (0.7)       | 824 (99.3)    |                    |
| > 40 mm                                                        | 225 (100)     | 4 (1.8)       | 221 (98.2)    |                    |
| Missing                                                        | 57 (100)      | 3 (5.3)       | 54 (94.7)     |                    |
| ypT stage                                                      |               |               |               |                    |
| Tx/TO                                                          | 94 (100)      | 83 (88.3)     | 11 (11.7)     | <.001 <sup>c</sup> |
| Tis                                                            | 5 (100)       | 2 (40.0)      | 3 (60.0)      |                    |

|                                |            |           |             |                    |
|--------------------------------|------------|-----------|-------------|--------------------|
| T1                             | 325 (100)  | 0 (0)     | 325 (100)   |                    |
| T2                             | 367 (100)  | 0 (0)     | 367 (100)   |                    |
| T3                             | 897 (100)  | 0 (0)     | 897 (100)   |                    |
| T4                             | 70 (100)   | 0 (0)     | 70 (100)    |                    |
| ypN stage                      |            |           |             |                    |
| N0                             | 936 (100)  | 83 (8.9)  | 853 (91.1)  | <.001 <sup>c</sup> |
| N1-2                           | 811 (100)  | 2 (0.2)   | 809 (99.8)  |                    |
| Missing                        | 11         | 0         | 11          |                    |
| ypM stage                      |            |           |             |                    |
| M0                             | 1252 (100) | 67 (5.4)  | 1185 (94.6) | .03 <sup>c</sup>   |
| M1                             | 44 (100)   | 0 (0)     | 44 (100)    |                    |
| Mx                             | 265 (100)  | 15 (5.7)  | 250 (94.3)  |                    |
| Missing                        | 197 (100)  | 3 (1.5)   | 194 (98.5)  |                    |
| Lymphovascular invasion        |            |           |             |                    |
| No                             | 901 (100)  | 73 (8.1)  | 828 (91.9)  | <.001 <sup>c</sup> |
| Yes                            | 763 (100)  | 0 (0)     | 763 (100)   |                    |
| Missing                        | 94 (100)   | 12 (12.8) | 82 (87.2)   |                    |
| Perineural invasion            |            |           |             |                    |
| No                             | 518 (100)  | 73 (14.1) | 445 (85.9)  | <.001 <sup>c</sup> |
| Yes                            | 1177 (100) | 0 (0)     | 1177 (100)  |                    |
| Missing                        | 63 (100)   | 12 (19.0) | 51 (81.0)   |                    |
| Differentiation                |            |           |             |                    |
| Gx (not possible to determine) | 190 (100)  | 60 (31.6) | 130 (68.4)  | <.001 <sup>c</sup> |
| G1 (well differentiated)       | 241 (100)  | 0 (0)     | 241 (100)   |                    |
| G2 (moderate differentiated)   | 831 (100)  | 0 (0)     | 831 (100)   |                    |
| G3 (poorly differentiated)     | 320 (100)  | 0 (0)     | 320 (100)   |                    |
| G4 (undifferentiated)          | 3 (100)    | 0 (0)     | 3 (100)     |                    |
| Missing                        | 173 (100)  | 25 (14.5) | 148 (85.5)  |                    |
| Residual disease               |            |           |             |                    |
| R0                             | 1267 (100) | 79 (6.2)  | 1188 (93.8) | <.001 <sup>c</sup> |
| R1                             | 299 (100)  | 0 (0)     | 299 (100)   |                    |
| R2                             | 8 (100)    | 0 (0)     | 8 (100)     |                    |
| Unknown/missing                | 184 (100)  | 6 (3.3)   | 178 (96.7)  |                    |

pCR, pathological complete response; SD, standard deviation; ASA-PS, American Society of Anesthesiologists Performance Status; mm, millimeters; CA-19.9, carbohydrate 19.9; U, units; ml, milliliters; CEA, carcinoembryonic antigen; ng, nanogram; SBRT, stereotactic body radiotherapy; ±, comparison between patients with or without pCR.  $\alpha$ , Welch independent two-sample T-Test;  $b$ , Chi-square Test;  $c$ , Fisher's Exact Test;  $d$ , Wilcoxon Rank Sum Test.

Categorical data with missing data for  $\geq 2\%$  of patients were included in a separate category and were therefore included in the overall proportions and in the test of association. Otherwise, for missing  $< 2\%$ , the data are shown but were not included in the hypothesis tests.



## APPENDIX 5. Survival

### APPENDIX 5a. OS - Overall cohort

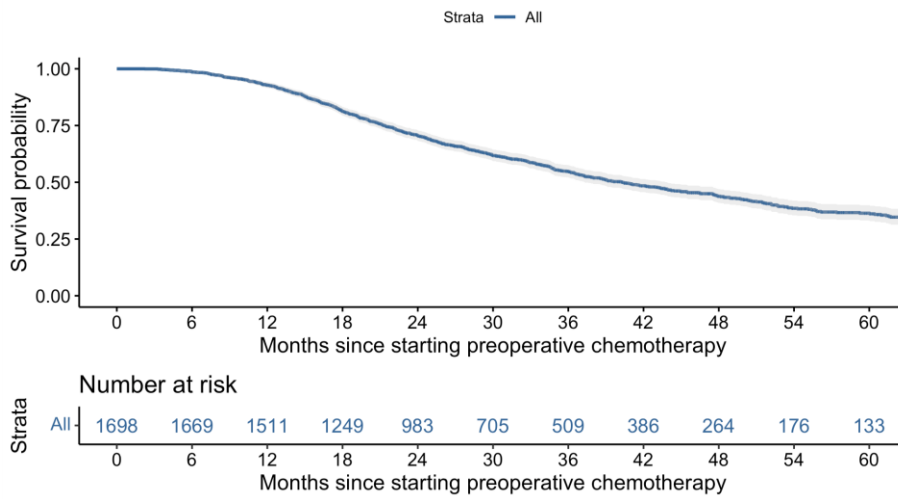

**FIGURE 5b. OS - Patients with pCR vs. without pCR**

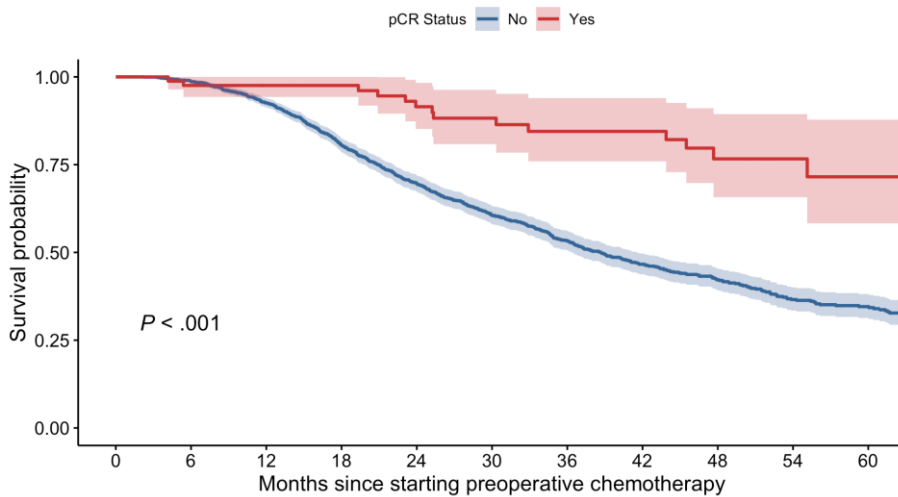

**Overall survival (OS) measured from start of preoperative chemotherapy:**

**Figure 5a:** mOS = 40 months (95%CI 37-44); 1-year OS = 93% (95%CI 92-94); 3-year OS = 55% (95%CI 52-58); 5-year OS = 36% (95%CI 33-40).

**Figure 5b:** Patients without pCR: mOS = 39 months (95%CI 36-42); 1-year OS = 93% (95%CI 91-94); 3-year OS = 53% (95%CI 51-56); 5-year OS = 34% (95%CI 31-38). Patients with pCR: mOS = not reached; 1-year OS = 98% (95%CI 94-100); 3-year OS = 85% (95%CI 76-94); 5-year OS = 72% (95%CI 58-88).

**APPENDIX 6. Recurrence site in patients with disease recurrence**

| <b>Variables</b>                  | <b>Patients, No. (%)</b> |                            | <b>P value</b>   |
|-----------------------------------|--------------------------|----------------------------|------------------|
|                                   | <b>pCR<br/>n = 21</b>    | <b>No pCR<br/>n = 1015</b> |                  |
| Locoregional recurrence           | 8 (38.1)                 | 377 (37.1)                 | .10 <sup>c</sup> |
| Distant recurrence                | 12 (57.1)                | 409 (40.3)                 |                  |
| Locoregional + distant recurrence | 1 (4.8)                  | 229 (22.6)                 |                  |

*pCR*, pathological complete response; c, Fisher's Exact Test.

**APPENDIX 7. Region-specific data**

| Variables                       | Patients, No. (%) |                          |                  |
|---------------------------------|-------------------|--------------------------|------------------|
|                                 | Europe<br>n = 594 | United States<br>n = 798 | Japan<br>n = 366 |
| <b>Baseline characteristics</b> |                   |                          |                  |
| Age (mean ± SD) (years)         | 63 (10)           | 64 (9)                   | 66 (9)           |
| Resectability                   |                   |                          |                  |
| Primary resectable              | 171 (28.8)        | 164 (20.8)               | 94 (25.7)        |
| Borderline resectable           | 314 (52.9)        | 397 (50.3)               | 145 (39.6)       |
| Locally advanced                | 109 (18.4)        | 229 (29.0)               | 127 (34.7)       |
| Missing                         | 0                 | 8                        | 0                |
| Tumor location                  |                   |                          |                  |
| Pancreatic head                 | 423 (71.2)        | 592 (74.3)               | 261 (71.3)       |
| Pancreatic body/tail            | 171 (28.8)        | 205 (25.7)               | 105 (28.7)       |
| Missing                         | 0                 | 1                        | 0                |
| CA-19.9 (median, IQR)           | 181 (40-549)      | 192 (55-690)             | 167 (37-500)     |
| Missing                         | 200               | 99                       | 25               |
| CEA (median, IQR)               | 2.6 (2.2-4.2)     | 3.7 (2.2-6.2)            | 3.4 (2.1-5.7)    |
| Missing                         | 315               | 535                      | 37               |
| <b>Preoperative therapy</b>     |                   |                          |                  |
| Chemotherapy*                   |                   |                          |                  |
| (m)FOLFIRINOX                   | 315 (53.0)        | 459 (57.5)               | 23 (6.3)         |
| Gemcitabine-nab-paclitaxel      | 110 (18.5)        | 229 (28.7)               | 162 (44.3)       |
| Gemcitabine-S1                  | 1 (0.2)           | 0 (0)                    | 99 (27.0)        |
| Gemcitabine-oxaliplatin         | 96 (16.2)         | 5 (0.6)                  | 0 (0)            |
| Other multi-agent regimens      | 26 (4.4)          | 60 (7.5)                 | 4 (1.1)          |
| Gemcitabine                     | 46 (7.7)          | 27 (3.4)                 | 24 (6.6)         |
| S1                              | 0 (0)             | 0 (0)                    | 53 (14.5)        |
| Other single-agent regimens     | 0 (0)             | 18 (2.3)                 | 1 (0.3)          |
| Second-line chemotherapy        | 21 (3.5)          | 142 (17.8)               | 53 (14.5)        |
| Missing                         | 0 (0)             | 0 (0)                    | 74 (20.2)        |
| Chemotherapy dose reduction     | 77 (13.0)         | 117 (14.7)               | 56 (15.3)        |
| Missing                         | 95 (16.0)         | 412 (51.6)               | 153 (41.8)       |
| Radiotherapy                    |                   |                          |                  |
| No                              | 377 (63.5)        | 233 (29.3)               | 261 (73.5)       |
| Yes, conventional radiotherapy  | 206 (34.7)        | 168 (21.2)               | 88 (24.8)        |
| Yes, SBRT                       | 11 (1.9)          | 393 (49.5)               | 6 (1.7)          |
| Missing                         | 0                 | 4                        | 11               |
| Preoperative therapy duration   |                   |                          |                  |
| < 4 months                      | 144 (24.2)        | 156 (19.5)               | 175 (47.8)       |
| ≥ 4 to < 6 months               | 165 (27.8)        | 224 (28.1)               | 80 (21.9)        |
| ≥ 6 to < 12 months              | 245 (41.2)        | 311 (39.0)               | 81 (22.1)        |
| ≥ 12 months                     | 32 (5.4)          | 57 (7.1)                 | 29 (7.9)         |
| Missing                         | 8 (1.3)           | 50 (6.3)                 | 1 (0.3)          |
| <b>Disease response</b>         |                   |                          |                  |
| RECIST                          |                   |                          |                  |
| Complete response               | 8 (1.4)           | 5 (0.6)                  | 1 (0.3)          |
| Partial response                | 230 (39.0)        | 147 (18.6)               | 129 (35.9)       |
| Stable disease                  | 348 (59.0)        | 630 (79.7)               | 216 (60.2)       |
| Progressive disease             | 4 (0.7)           | 8 (1.0)                  | 13 (3.6)         |

|                                                                    |               |               |               |
|--------------------------------------------------------------------|---------------|---------------|---------------|
| Missing                                                            | 4             | 8             | 7             |
| CA-19.9 (median, IQR) (U/ml)                                       | 30 (12-71)    | 42 (18-115)   | 28 (11-72)    |
| Missing                                                            | 150           | 94            | 1             |
| CEA (median, IQR) (U/ml)                                           | 2.5 (2.0-3.6) | 3.1 (1.9-5.5) | 3.3 (2.1-5.1) |
| Missing                                                            | 259           | 545           | 1             |
| <b>Histopathology</b>                                              |               |               |               |
| pCR                                                                | 26 (4.4)      | 53 (6.6)      | 6 (1.6)       |
| <b>Follow-up</b>                                                   |               |               |               |
| Adjuvant chemotherapy                                              | 375 (63.1)    | 483 (60.5)    | 292 (79.8)    |
| Missing                                                            | 15 (2.5)      | 137 (17.2)    | 5 (1.4)       |
| Median OS from surgery (months) (95%CI)                            | 32 (30-39)    | 30 (27-37)    | 39 (33-46)    |
| Missing                                                            | 0             | 1             | 0             |
| Median OS from start of preoperative chemotherapy (months) (95%CI) | 41 (36-50)    | 37 (34-42)    | 46 (39-52)    |
| Missing                                                            | 8             | 51            | 1             |

*SD*, standard deviation; *ASA-PS*, American Society of Anesthesiologists Performance Status; *mm*, millimeters; *CA-19.9*, carbohydrate 19.9; *U*, units; *ml*, milliliters; *CEA*, carcinoembryonic antigen; *ng*, nanogram; *SBRT*, stereotactic body radiotherapy; *RECIST*, response evaluation criteria in solid tumors; *pCR*, pathological complete response; *OS*, overall survival.

Categorical data with missing data for  $\geq 2\%$  of patients were included in a separate category and were therefore included in the overall proportions and in the test of association. Otherwise, for missing  $< 2\%$ , the data are shown but were not included in the hypothesis tests.

NB. In some patients with pCR, a tumor size  $> 0\text{mm}$  was registered. Because no vital tumor cells were detected, this suggests that the assumed 'former non-vital tumor tissue' is included in calculating the tumor size by the local pathologist.

NB. In some patients with pCR, data about lymphovascular invasion, perineural invasion, tumor differentiation, and/or residual disease is missing. This data is handled as missing, although the absence of lymphovascular and perineural invasion, impossibility to determine differentiation, and no residual disease in the resection margins can be assumed.
